# Supplementary material
Source: PubMed Central journal article supplement (PMC3601952)
Supplement: supp_djt005_jnci_JNCI_12_1333_s01.pdf [file supp_djt005_jnci_JNCI_12_1333_s01.pdf]

**Supplementary Table 1. Comparison of demographic characteristics of patients with RCC and control subjects**

| Characteristic                          | Cases<br>n=577 | Control<br>n=593 | P value |
|-----------------------------------------|----------------|------------------|---------|
| <b>Age (years)</b>                      |                |                  |         |
| Mean (SD)                               | 59.3 (10.7)    | 58.9 (9.3)       | 0.524   |
| <b>Sex, n(%)</b>                        |                |                  |         |
| Men                                     | 382 (66.20)    | 382 (64.42)      |         |
| Women                                   | 195 (33.80)    | 211 (35.58)      | 0.521   |
| <b>Smoking status, n(%) *</b>           |                |                  |         |
| Never smoker                            | 305 (52.95)    | 294 (49.58)      |         |
| Former smoker                           | 200 (34.72)    | 212 (35.75)      |         |
| Current smoker or recent quitter        | 71 (12.33)     | 87 (14.67)       | 0.382   |
| <b>Pack-years smoking</b>               |                |                  |         |
| Median (range)                          | 19 (0.15-150)  | 24 (0.05-133)    | 0.195   |
| <b>Hypertension</b>                     |                |                  |         |
| Yes                                     | 325 (56.42)    | 240 (40.47)      |         |
| No                                      | 251 (43.58)    | 353 (59.53)      | <0.001  |
| <b>Usual BMI †</b>                      |                |                  |         |
| Normal (<25 kg/m <sup>2</sup> )         | 80 (17.20)     | 161 (27.52)      |         |
| Overweight (25-29.9 kg/m <sup>2</sup> ) | 178 (38.28)    | 223 (38.12)      |         |
| Obese (≥30 kg/m <sup>2</sup> )          | 207 (44.52)    | 201 (34.36)      | <0.001  |
| Continuous, Mean(SD)                    | 30.7 (7.23)    | 28.7 (6.06)      | <0.001  |
| <b>BMI at age 20</b>                    |                |                  |         |
| Normal (<25 kg/m <sup>2</sup> )         | 304 (65.80)    | 446 (76.24)      |         |
| Overweight (25-29.9 kg/m <sup>2</sup> ) | 124 (26.84)    | 118 (20.17)      |         |
| Obese (≥30 kg/m <sup>2</sup> )          | 34 (7.36)      | 21 (3.59)        | <0.001  |
| Continuous, Mean(SD)                    | 23.9 (4.20)    | 22.7 (3.63)      | <0.001  |
| <b>BMI at age 40</b>                    |                |                  |         |
| Normal (<25 kg/m <sup>2</sup> )         | 145 (32.44)    | 265 (46.49)      |         |
| Overweight (25-29.9 kg/m <sup>2</sup> ) | 180 (40.27)    | 220 (38.60)      |         |
| Obese (≥30 kg/m <sup>2</sup> )          | 122 (27.29)    | 85 (14.91)       | <0.001  |
| Continuous, Mean(SD)                    | 27.9 (5.83)    | 25.9 (4.81)      | <0.001  |
| <b>Physical activity ‡</b>              |                |                  |         |
| Intensive                               | 77 (17.04)     | 214 (36.96)      |         |
| Medium                                  | 124 (27.43)    | 200 (34.54)      |         |
| Low                                     | 251 (55.53)    | 165 (28.50)      | <0.001  |

\*Smoking status: Never smoker, individuals who had never smoked or had smoked <100 cigarettes in their life time; Former smoker, individuals who had smoked at least 100 cigarettes in their lifetime but had quit more than 12 months before recruitment; Current smokers, individuals who are currently smoking or had quit less than 12 months before recruitment.

†Usual BMI refers to BMI at 3yrs before the diagnosis or recruitment.

‡ Intensive: MET≥45/wk.; Medium: MET 27-44.9/wk.; Low: MET<27/wk.

**Supplementary Table 2. The comparison of characteristics for cases with genotyping data and those without**

| Characteristics                         | Cases with genotyping data | Cases without genotyping data | p-value |
|-----------------------------------------|----------------------------|-------------------------------|---------|
| N=577                                   | 402 (69.67%)               | 175(30.33%)                   |         |
| <b>Age, Mean(SD)</b>                    | 59.7(10.4)                 | 58.3(11.3)                    | 0.136   |
| <b>Sex</b>                              |                            |                               |         |
| Male                                    | 272(67.66%)                | 110(62.86%)                   | 0.262   |
| Female                                  | 130(32.34%)                | 65(37.14%)                    |         |
| <b>Smoking *</b>                        |                            |                               |         |
| Non-smokers                             | 200(49.88%)                | 105(60.00%)                   | 0.065   |
| Former smokers                          | 153(38.15%)                | 47(26.86%)                    |         |
| Recent quitters                         | 13(3.24%)                  | 5(2.86%)                      |         |
| Current smokers                         | 35(8.73%)                  | 18(10.29%)                    |         |
| <b>Usual BMI †</b>                      |                            |                               |         |
| Normal (<25 kg/m <sup>2</sup> )         | 60(16.90%)                 | 20(18.18%)                    | 0.178   |
| Overweight (25-29.9 kg/m <sup>2</sup> ) | 144(40.56%)                | 34(30.91%)                    |         |
| Obese (≥30 kg/m <sup>2</sup> )          | 151(42.54%)                | 56(50.91%)                    |         |
| <b>BMI at age 40</b>                    |                            |                               |         |
| Normal (<25 kg/m <sup>2</sup> )         | 111(32.55%)                | 33(31.73%)                    | 0.497   |
| Overweight (25-29.9 kg/m <sup>2</sup> ) | 141(41.35%)                | 38(36.54%)                    |         |
| Obese (≥30 kg/m <sup>2</sup> )          | 89(26.10%)                 | 33(31.73%)                    |         |
| <b>BMI at age 20</b>                    |                            |                               |         |
| Normal (<25 kg/m <sup>2</sup> )         | 231(65.44%)                | 73(66.97%)                    | 0.054   |
| Overweight (25-29.9 kg/m <sup>2</sup> ) | 101(28.61%)                | 23(21.10%)                    |         |
| Obese (≥30 kg/m <sup>2</sup> )          | 21(5.95%)                  | 13(11.93%)                    |         |
| <b>Weight change</b>                    |                            |                               |         |
| Weight loss >0 lbs.                     | 15(4.41%)                  | 9(8.74%)                      | 0.286   |
| Weight gain 0.1-10 lbs.                 | 85(25.00%)                 | 23(23.33%)                    |         |
| Weight gain 10.1-25 lbs.                | 109(32.06%)                | 28(27.18%)                    |         |
| Weight gain >25 lbs.                    | 131(38.53%)                | 43(41.75%)                    |         |
| <b>Physical activity ‡</b>              |                            |                               |         |
| Intensive                               | 61(17.63%)                 | 16(15.09%)                    | 0.790   |
| Medium                                  | 93(26.88%)                 | 31(29.25%)                    |         |
| Low                                     | 192(55.49%)                | 59(55.66%)                    |         |
| <b>Hypertension</b>                     |                            |                               |         |
| No                                      | 168(41.79%)                | 83(47.70%)                    | 0.189   |
| Yes                                     | 234(58.21%)                | 91(52.30%)                    |         |

\*Smoking status: Never smoker, individuals who had never smoked or had smoked <100 cigarettes in their life time; Former smoker, individuals who had smoked at least 100 cigarettes in their lifetime but had quit more than 12 months before recruitment; Current smokers, individuals who are currently smoking or had quit less than 12 months before recruitment.

† Usual BMI refers to BMI at 3yrs before the diagnosis or recruitment.

‡ Intensive: MET≥45/wk.; Medium: MET 27-44.9/wk.; Low: MET<27/wk.

**Supplementary Table 3. Comparison of host characteristics across weight change groups**

| Characteristics                         | Weight loss >0 lbs. | Weight gain 0.1-10 lbs. | Weight gain 10.1-25 lbs. | Weight gain >25 lbs. | P-value |
|-----------------------------------------|---------------------|-------------------------|--------------------------|----------------------|---------|
| <b>Case/Control</b>                     | 24/28               | 109/204                 | 138/167                  | 174/171              |         |
| <b>Age, Mean(SD)</b>                    | 59.1(8.9)           | 61.5(9.1)               | 60.3(8.9)                | 57.6(9.3)            | <0.001  |
| <b>Age, Median(Range)</b>               | 59(41-81)           | 62(40-86)               | 61(41-87)                | 58(40-78)            | <0.001  |
| <b>Sex</b>                              |                     |                         |                          |                      |         |
| Male                                    | 34(65.38%)          | 196(62.62%)             | 207(67.87%)              | 231(66.96%)          |         |
| Female                                  | 18(34.62%)          | 117(37.38%)             | 98(32.13%)               | 114(33.04%)          | 0.533   |
| <b>Smoking *</b>                        |                     |                         |                          |                      |         |
| Non-smokers                             | 23(44.23%)          | 147(47.12%)             | 166(54.43%)              | 170(49.28%)          | 0.199   |
| Former smokers                          | 19(36.54%)          | 124(39.74%)             | 103(33.77%)              | 125(36.23%)          |         |
| Recent quitters                         | 0(0.00)             | 4(1.28%)                | 7(2.3%)                  | 12(3.48%)            |         |
| Current smokers                         | 10(19.23%)          | 37(11.86%)              | 29(9.51%)                | 38(11.01%)           |         |
| <b>Usual BMI †</b>                      |                     |                         |                          |                      |         |
| Normal (<25 kg/m <sup>2</sup> )         | 15(28.85%)          | 127(40.58%)             | 63(20.72%)               | 25(7.25%)            | <0.001  |
| Overweight (25-29.9 kg/m <sup>2</sup> ) | 22(42.31%)          | 129(41.21%)             | 139(45.72%)              | 103(29.86%)          |         |
| Obese (≥30 kg/m <sup>2</sup> )          | 15(28.85%)          | 57(18.21%)              | 102(33.55%)              | 217(62.90%)          |         |
| <b>BMI at age 40</b>                    |                     |                         |                          |                      |         |
| Normal (<25 kg/m <sup>2</sup> )         | 22(42.31%)          | 207(66.13%)             | 133(43.61%)              | 48(13.91%)           | <0.001  |
| Overweight (25-29.9 kg/m <sup>2</sup> ) | 23(44.23%)          | 91(29.07%)              | 146(47.87%)              | 140(40.58%)          |         |
| Obese (≥30 kg/m <sup>2</sup> )          | 7(13.46%)           | 15(4.79%)               | 26(8.52%)                | 157(45.51%)          |         |
| <b>BMI at age 20</b>                    |                     |                         |                          |                      |         |
| Normal (<25 kg/m <sup>2</sup> )         | 15(28.85%)          | 231(73.80%)             | 233(76.39%)              | 249(72.17%)          | <0.001  |
| Overweight (25-29.9 kg/m <sup>2</sup> ) | 26(50.00%)          | 70(22.36%)              | 63(20.66%)               | 75(21.74%)           |         |
| Obese (≥30 kg/m <sup>2</sup> )          | 11(21.15%)          | 12(3.83%)               | 9(2.95%)                 | 21(6.09%)            |         |
| <b>Physical activity ‡</b>              |                     |                         |                          |                      |         |
| Intensive                               | 21(40.38%)          | 99(32.57%)              | 88(29.24%)               | 72(21.30%)           | <0.001  |
| Medium                                  | 20(38.46%)          | 100(32.89%)             | 96(31.89%)               | 102(30.18%)          |         |
| Low                                     | 11(21.15%)          | 105(34.54%)             | 117(38.87%)              | 164(48.52%)          |         |
| <b>Hypertension</b>                     |                     |                         |                          |                      |         |
| No                                      | 30(57.69%)          | 191(61.02%)             | 154(50.49%)              | 191(55.36%)          | <0.001  |
| Yes                                     | 22(42.31%)          | 122(38.98%)             | 151(49.51%)              | 154(44.64%)          |         |

\*Smoking status: Never smoker, individuals who had never smoked or had smoked <100 cigarettes in their life time; Former smoker, individuals who had smoked at least 100 cigarettes in their lifetime but had quit more than 12 months before recruitment; Current smokers, individuals who are currently smoking or had quit less than 12 months before recruitment.

†Usual BMI refers to BMI at 3yrs before the diagnosis or recruitment.

‡ Intensive: MET≥45/wk.; Medium: MET 27-44.9/wk.; Low: MET<27/wk.

**Supplementary Table 4. Selected SNPs, locations, and gene names**

| SNP name   | Linked SNP* | Minor Allele | chromosome | Gene |
|------------|-------------|--------------|------------|------|
| rs2498804  |             | A            | 14         | AKT1 |
| rs2494738  |             | A            | 14         | AKT1 |
| rs12460555 | rs4479364   | A            | 19         | AKT2 |
| rs892119   |             | A            | 19         | AKT2 |
| rs3730050  |             | A            | 19         | AKT2 |
| rs4322213  | rs4614244   | G            | 1          | AKT3 |
| rs1417121  | rs1058304   | A            | 1          | AKT3 |
| rs3006936  | rs1538773   | C            | 1          | AKT3 |
| rs10927076 | rs4132509   | A            | 1          | AKT3 |
| rs10927035 | rs2345994   | A            | 1          | AKT3 |
| rs12047209 | rs12031994  | G            | 1          | AKT3 |
| rs1121276  |             | G            | 1          | AKT3 |
| rs9428576  |             | G            | 1          | AKT3 |
| rs3766673  |             | G            | 1          | AKT3 |
| rs4430311  |             | G            | 1          | AKT3 |
| rs7523742  |             | A            | 1          | AKT3 |
| rs12053536 | rs7587551   | G            | 2          | IRS1 |
| rs16822642 | rs1560251   | A            | 2          | IRS1 |
| rs17208470 |             | A            | 2          | IRS1 |
| rs6725330  |             | G            | 2          | IRS1 |
| rs1865434  | rs11843936  | G            | 13         | IRS2 |
| rs1414318  | rs7986346   | C            | 13         | IRS2 |
| rs1044364  | rs12584136  | A            | 13         | IRS2 |
| rs7999797  |             | G            | 13         | IRS2 |
| rs9521509  |             | G            | 13         | IRS2 |
| rs4773094  |             | A            | 13         | IRS2 |
| rs4773092  |             | A            | 13         | IRS2 |
| rs7987651  |             | A            | 13         | IRS2 |
| rs9515120  |             | A            | 13         | IRS2 |
| rs4773088  |             | A            | 13         | IRS2 |
| rs9515119  |             | C            | 13         | IRS2 |
| rs4771644  |             | A            | 13         | IRS2 |
| rs7981705  |             | A            | 13         | IRS2 |
| rs4771647  |             | C            | 13         | IRS2 |
| rs11121696 | rs1417131   | G            | 1          | MTOR |
| rs1770345  |             | C            | 1          | MTOR |
| rs4972839  | rs3792256   | G            | 2          | PDK1 |
| rs1920978  |             | A            | 2          | PDK1 |
| rs12151618 |             | A            | 2          | PDK1 |
| rs13019331 |             | A            | 2          | PDK1 |

|            |            |   |    |         |
|------------|------------|---|----|---------|
| rs6540991  | rs6540985  | G | 1  | PIK3CD  |
| rs12568084 |            | A | 1  | PIK3CD  |
| rs4129341  |            | C | 1  | PIK3CD  |
| rs4240910  |            | G | 1  | PIK3CD  |
| rs6541017  |            | G | 1  | PIK3CD  |
| rs12075554 |            | A | 1  | PIK3CD  |
| rs11202600 | rs11202607 | A | 10 | PTEN    |
| rs926091   | rs10788575 | A | 10 | PTEN    |
| rs2248293  |            | G | 10 | PTEN    |
| rs478839   |            | G | 10 | PTEN    |
| rs1234221  |            | C | 10 | PTEN    |
| rs11202596 |            | A | 10 | PTEN    |
| rs758666   | rs2299967  | A | 7  | RHEB    |
| rs6959096  | rs12669535 | G | 7  | RHEB    |
| rs13224450 |            | G | 7  | RHEB    |
| rs717775   |            | C | 7  | RHEB    |
| rs6951571  |            | A | 7  | RHEB    |
| rs6972955  |            | A | 7  | RHEB    |
| rs2058495  |            | A | 7  | RHEB    |
| rs2299962  |            | A | 7  | RHEB    |
| rs17635967 |            | G | 7  | RHEB    |
| rs17713451 |            | A | 7  | RHEB    |
| rs4549696  |            | A | 7  | RHEB    |
| rs4710127  | rs4710128  | A | 6  | RPS6KA2 |
| rs2984     | rs9355578  | A | 6  | RPS6KA2 |
| rs9356531  |            | A | 6  | RPS6KA2 |
| rs10897487 | rs538147   | A | 11 | RPS6KA4 |
| rs7155799  | rs17799519 | A | 14 | RPS6KA5 |
| rs8014028  | rs11622397 | A | 14 | RPS6KA5 |
| rs180515   |            | G | 17 | RPS6KB1 |
| rs1051424  | rs1292043  | G | 17 | RPS6KB1 |
| rs10274    | rs11601325 | A | 11 | RPS6KB2 |
| rs4951662  | rs6540776  | A | 1  | RPS6KC1 |
| rs9429904  | rs4655415  | G | 1  | RPS6KC1 |
| rs7158047  | rs2286914  | G | 14 | RPS6KL1 |
| rs2286913  | rs12147862 | G | 14 | RPS6KL1 |
| rs11159109 |            | A | 14 | RPS6KL1 |
| rs12951596 |            | A | 17 | RPTOR   |
| rs7208502  |            | A | 17 | RPTOR   |
| rs6565498  |            | A | 17 | RPTOR   |
| rs2878052  |            | A | 17 | RPTOR   |
| rs3751932  |            | G | 17 | RPTOR   |
| rs4969266  |            | A | 17 | RPTOR   |

|            |   |    |       |
|------------|---|----|-------|
| rs2672890  | A | 17 | RPTOR |
| rs9915378  | A | 17 | RPTOR |
| rs7219896  | G | 17 | RPTOR |
| rs3923514  | G | 17 | RPTOR |
| rs12937147 | G | 17 | RPTOR |
| rs9906827  | A | 17 | RPTOR |
| rs7215564  | G | 17 | RPTOR |
| rs7219318  | A | 17 | RPTOR |
| rs2589149  | A | 17 | RPTOR |
| rs4889863  | G | 17 | RPTOR |
| rs4889875  | A | 17 | RPTOR |
| rs2333990  | A | 17 | RPTOR |
| rs7502124  | A | 17 | RPTOR |
| rs11651724 | A | 17 | RPTOR |
| rs7212142  | A | 17 | RPTOR |
| rs1468033  | G | 17 | RPTOR |
| rs2048753  | A | 17 | RPTOR |
| rs7208536  | A | 17 | RPTOR |
| rs2589150  | C | 17 | RPTOR |
| rs2280146  | G | 17 | RPTOR |
| rs7217174  | A | 17 | RPTOR |
| rs7217223  | A | 17 | RPTOR |
| rs4969230  | G | 17 | RPTOR |
| rs2672901  | A | 17 | RPTOR |
| rs1485330  | A | 17 | RPTOR |
| rs11150744 | C | 17 | RPTOR |
| rs7501659  | A | 17 | RPTOR |
| rs9674559  | G | 17 | RPTOR |
| rs9901366  | A | 17 | RPTOR |
| rs7503807  | C | 17 | RPTOR |
| rs9890502  | A | 17 | RPTOR |
| rs4969227  | A | 17 | RPTOR |
| rs1468027  | G | 17 | RPTOR |
| rs9899051  | A | 17 | RPTOR |
| rs8071015  | C | 17 | RPTOR |
| rs12949279 | G | 17 | RPTOR |
| rs2271608  | A | 17 | RPTOR |
| rs9897968  | A | 17 | RPTOR |
| rs4969429  | A | 17 | RPTOR |
| rs9894401  | A | 17 | RPTOR |
| rs3829572  | G | 17 | RPTOR |
| rs4890055  | C | 17 | RPTOR |
| rs7225525  | A | 17 | RPTOR |

|            |   |    |       |
|------------|---|----|-------|
| rs7209040  | A | 17 | RPTOR |
| rs9898178  | G | 17 | RPTOR |
| rs7225574  | A | 17 | RPTOR |
| rs12948054 | A | 17 | RPTOR |
| rs7221948  | G | 17 | RPTOR |
| rs2672893  | A | 17 | RPTOR |
| rs2589142  | A | 17 | RPTOR |
| rs2589158  | G | 17 | RPTOR |
| rs9908270  | C | 17 | RPTOR |
| rs7224748  | A | 17 | RPTOR |
| rs9900506  | G | 17 | RPTOR |
| rs9908195  | A | 17 | RPTOR |
| rs4889856  | G | 17 | RPTOR |
| rs2589118  | G | 17 | RPTOR |
| rs11653499 | A | 17 | RPTOR |
| rs4889782  | G | 17 | RPTOR |
| rs901065   | A | 17 | RPTOR |
| rs9911978  | G | 17 | RPTOR |
| rs2289762  | A | 17 | RPTOR |
| rs6420481  | G | 17 | RPTOR |
| rs8077832  | G | 17 | RPTOR |
| rs2589143  | A | 17 | RPTOR |
| rs9901846  | A | 17 | RPTOR |
| rs3751934  | A | 17 | RPTOR |
| rs7219745  | C | 17 | RPTOR |
| rs1062935  | G | 17 | RPTOR |
| rs12940622 | A | 17 | RPTOR |
| rs6565484  | G | 17 | RPTOR |
| rs2271602  | A | 17 | RPTOR |
| rs12951309 | A | 17 | RPTOR |
| rs746405   | C | 17 | RPTOR |
| rs12939076 | A | 17 | RPTOR |
| rs4969444  | A | 17 | RPTOR |
| rs12603074 | A | 17 | RPTOR |
| rs4062178  | G | 17 | RPTOR |
| rs2672886  | G | 17 | RPTOR |
| rs6565478  | A | 17 | RPTOR |
| rs4627412  | G | 17 | RPTOR |
| rs2589133  | G | 17 | RPTOR |
| rs999977   | A | 17 | RPTOR |
| rs2271612  | G | 17 | RPTOR |
| rs2289766  | G | 17 | RPTOR |
| rs9911223  | A | 17 | RPTOR |

|            |            |   |    |          |
|------------|------------|---|----|----------|
| rs12943041 |            | A | 17 | RPTOR    |
| rs7211818  |            | G | 17 | RPTOR    |
| rs1877926  |            | A | 17 | RPTOR    |
| rs4890042  |            | G | 17 | RPTOR    |
| rs2994329  |            | A | 1  | SDCCAG8  |
| rs3211995  | rs11876    | A | 16 | SLC9A3R2 |
| rs11876    |            | A | 16 | SLC9A3R2 |
| rs3827665  | rs10901219 | A | 9  | TSC1     |
| rs4962225  | rs7874234  | A | 9  | TSC1     |
| rs11553763 | rs10491535 | G | 9  | TSC1     |
| rs4367688  | rs3761840  | G | 9  | TSC1     |
| rs13295430 |            | A | 9  | TSC1     |
| rs4962081  |            | A | 9  | TSC1     |
| rs7874234  |            | A | 9  | TSC1     |
| rs1050700  |            | G | 9  | TSC1     |
| rs2519757  |            | G | 9  | TSC1     |
| rs2809243  |            | G | 9  | TSC1     |
| rs7040593  |            | A | 9  | TSC1     |
| rs2250057  |            | C | 9  | TSC1     |
| rs2809246  |            | A | 9  | TSC1     |
| rs11243929 |            | G | 9  | TSC1     |
| rs10491534 |            | G | 9  | TSC1     |
| rs2073636  |            | A | 16 | TSC2     |

---

\* Linked SNP: SNPs in high linkage disequilibrium ( $R^2 > 0.8$ , distance  $< 500\text{kb}$ ) for SNPs not covered by GWAS



**Supplementary Table 5. Significant associations between mTOR pathway genetic polymorphisms and RCC risk**

| Gene | SNP        | Alleles<br>(major/minor) | MAF* | Model                  | OR (95% CI) <sup>‡</sup> | P value  | Q Value <sup>§</sup> | P permute <sup>  </sup> | FDR <sup>¶</sup> |
|------|------------|--------------------------|------|------------------------|--------------------------|----------|----------------------|-------------------------|------------------|
| AKT3 | rs4132509  | C/A                      | 0.17 | Dominant               | 1.70(1.26 to 2.30)       | 5.26E-04 | <b>0.007</b>         | <b>&lt;0.001</b>        | <b>0.020</b>     |
|      |            |                          |      | Recessive              | 3.24(1.51 to 6.95)       | 0.002    |                      |                         |                  |
|      |            |                          |      | Additive <sup>†</sup>  | 1.68(1.30 to 2.17)       | 6.44E-05 |                      |                         |                  |
| AKT3 | rs3766673  | A/G                      | 0.17 | Dominant               | 1.55(1.14 to 2.09)       | 0.005    | <b>0.014</b>         | <b>0.001</b>            | <b>0.096</b>     |
|      |            |                          |      | Recessive              | 3.26(1.52 to 6.97)       | 0.002    |                      |                         |                  |
|      |            |                          |      | Additive <sup>†</sup>  | 1.57(1.22 to 2.02)       | 4.79E-04 |                      |                         |                  |
| AKT3 | rs12031994 | G/A                      | 0.13 | Dominant               | 1.63(1.19 to 2.23)       | 0.002    | <b>0.021</b>         | <b>&lt;0.001</b>        | <b>0.080</b>     |
|      |            |                          |      | Recessive              | 3.39(1.29 to 8.87)       | 0.013    |                      |                         |                  |
|      |            |                          |      | Additive <sup>†</sup>  | 1.63(1.23 to 2.15)       | 5.75E-04 |                      |                         |                  |
| AKT3 | rs4430311  | A/G                      | 0.32 | Dominant               | 1.46(1.08 to 1.96)       | 0.012    | <b>0.022</b>         | <b>0.001</b>            | <b>0.083</b>     |
|      |            |                          |      | Recessive              | 2.00(1.29 to 3.09)       | 0.002    |                      |                         |                  |
|      |            |                          |      | Additive <sup>†</sup>  | 1.44(1.16 to 1.79)       | 0.001    |                      |                         |                  |
| AKT3 | rs1058304  | A/G                      | 0.24 | Dominant               | 1.31(0.98 to 1.75)       | 0.067    | <b>0.026</b>         | <b>0.001</b>            | <b>0.097</b>     |
|      |            |                          |      | Recessive <sup>†</sup> | 2.61(1.46 to 4.68)       | 0.001    |                      |                         |                  |
|      |            |                          |      | Additive               | 1.40(1.11 to 1.76)       | 0.005    |                      |                         |                  |
| AKT3 | rs2345994  | G/A                      | 0.32 | Dominant               | 1.46(1.09 to 1.96)       | 0.011    | <b>0.033</b>         | <b>0.004</b>            | 0.128            |
|      |            |                          |      | Recessive              | 1.79(1.15 to 2.77)       | 0.010    |                      |                         |                  |
|      |            |                          |      | Additive <sup>†</sup>  | 1.41(1.14 to 1.75)       | 0.002    |                      |                         |                  |

\* MAF: minor allele frequency.

† Indicating best fitting model for each SNP based on smallest p-value

‡ Adjusted for age, sex, smoking status, BMI at 3 years prior to diagnosis or recruitment, and hypertension;

§ q value<0.05 was used for significance criteria

|| Permutation P value is calculated from 1000 permutations

¶ FDR: permutation-based false discovery rate

rs4132509 and rs3766673 are in high LD ( $r^2>0.80$ )
