# Supplementary material
Source: PubMed Central journal article supplement (PMC3601952)
Supplement: supp_djt005_jnci_JNCI_12_1333_s02.pdf [file supp_djt005_jnci_JNCI_12_1333_s02.pdf]

Supplementary Figure 1. Logistic spline regression for BMI and weight change using different knots. Logistic spline regression was performed using different knots. **A.** Usual BMI (4 knots). **B.** Usual BMI (5 knots). **C.** BMI at age 40 (4 knots). **D.** BMI at age 40 (5 knots). **E.** BMI at age 20 (4 knots). **F.** BMI at age 20 (5 knots). **G.** Weight change (3 knots). **H.** Weight change (4 knots). In all spline models, adjusting variables were the same as in the logistic regression models. The number of knots and segments was determined by the Akaike's Information Criterion. All statistical tests were two-sided. BMI=Body Mass Index

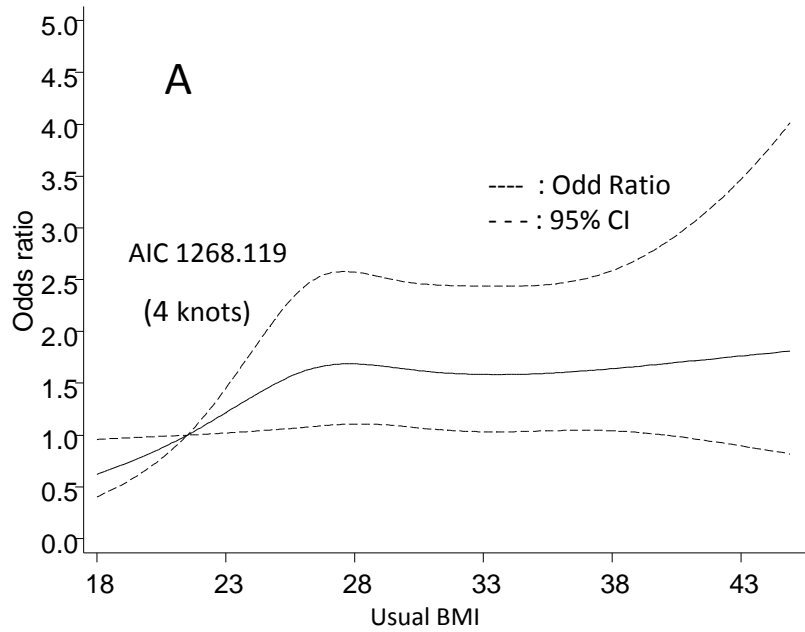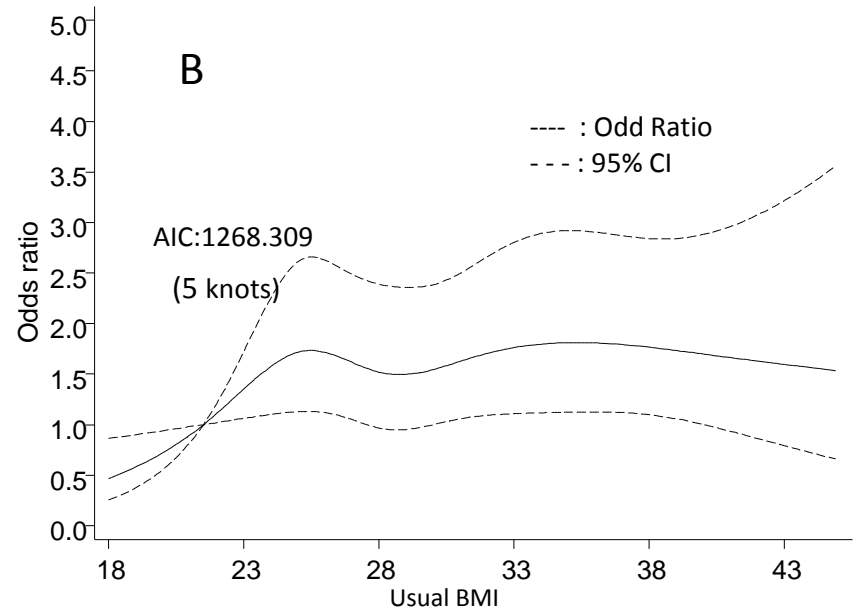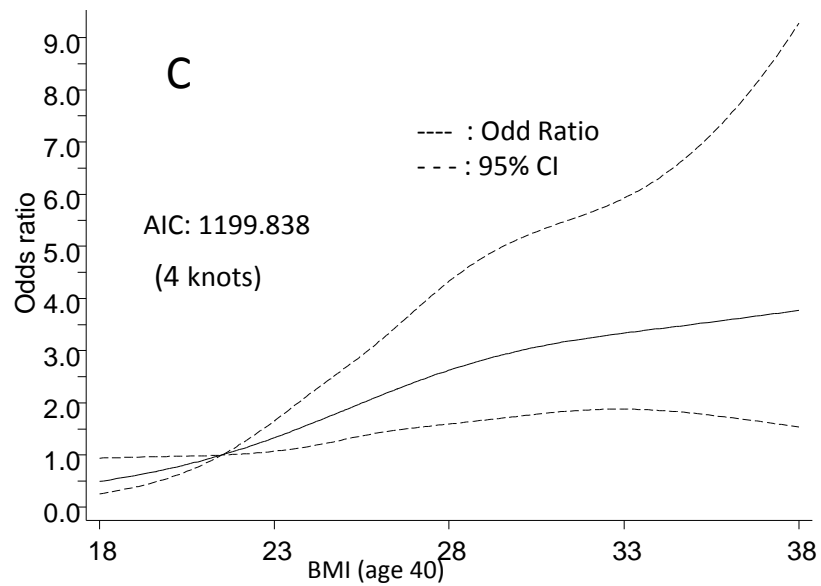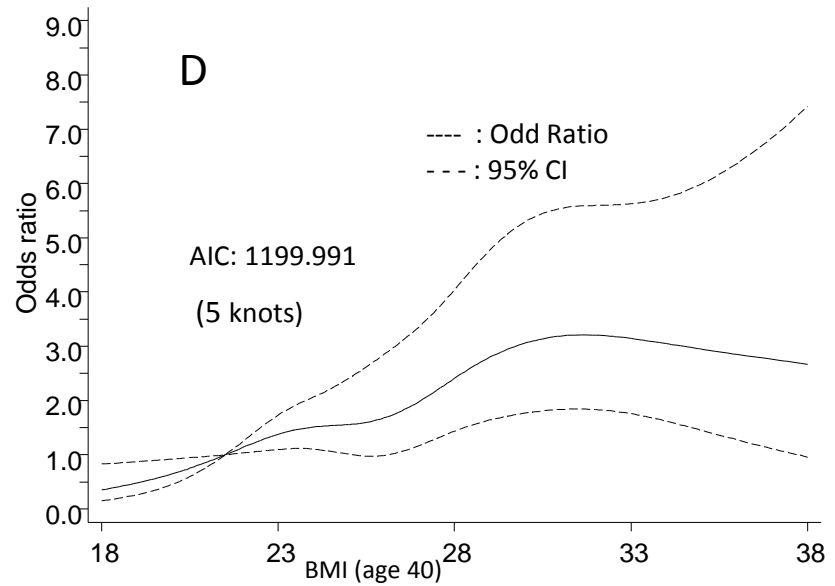

Supplementary Figure 1(A-D). Logistic spline regression for usual BMI, BMI at age 20, 40, and weight change, using different knots

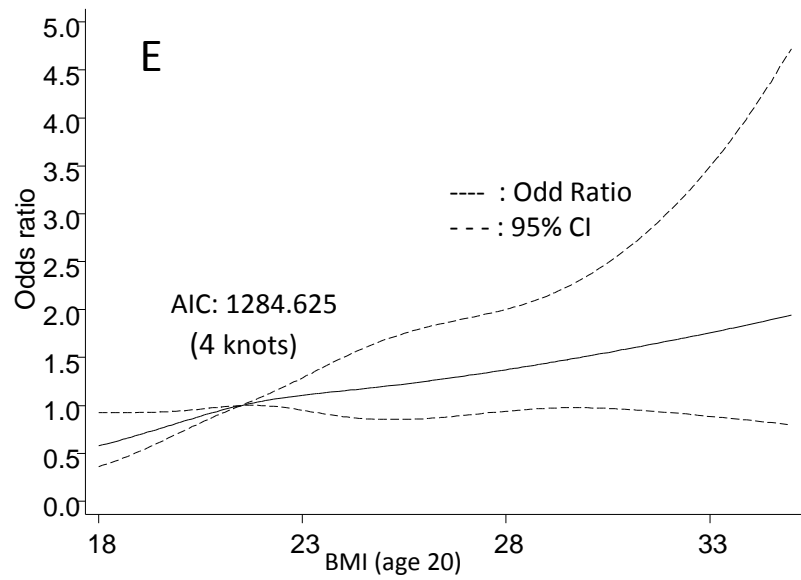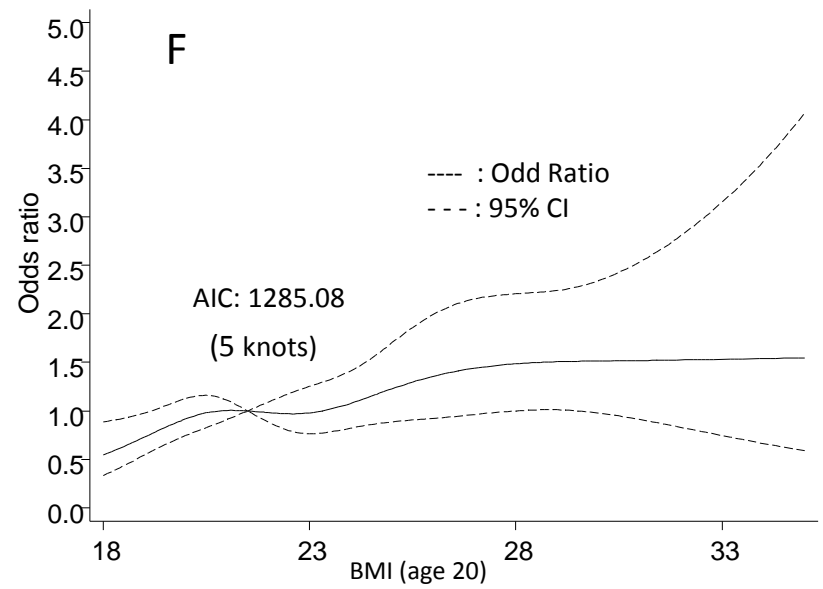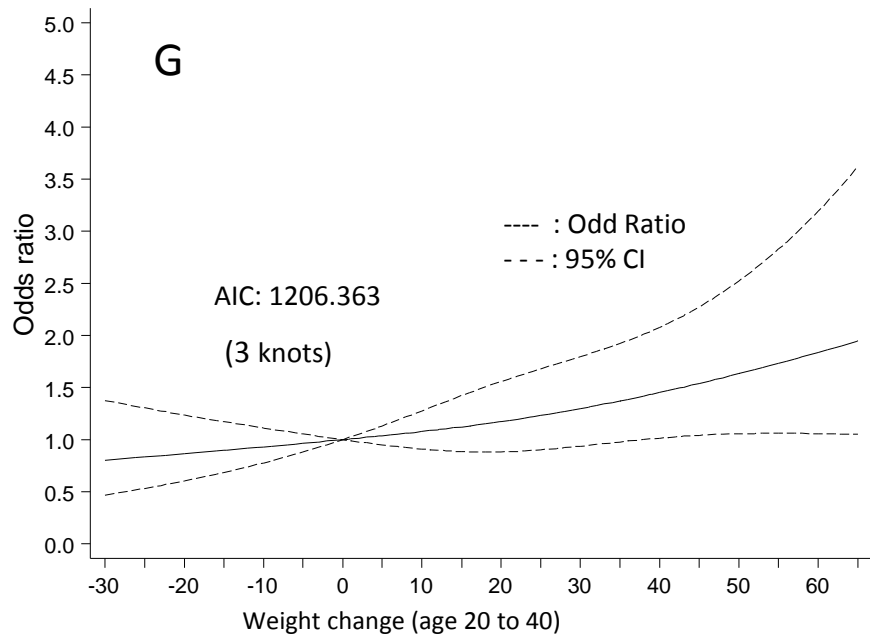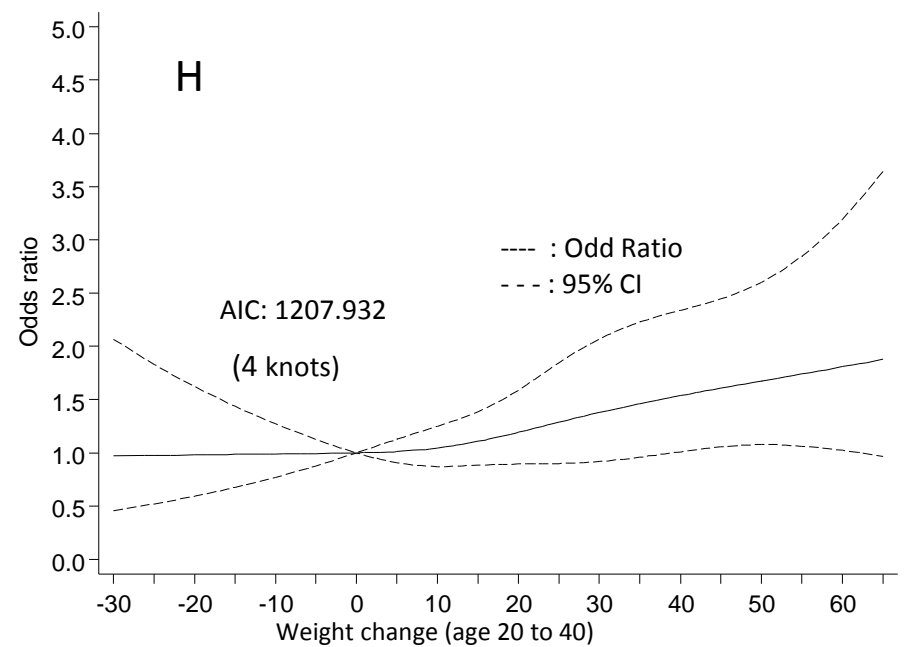

Supplementary Figure 1(E-H). Logistic spline regression for usual BMI, BMI at age 20, 40, and weight change, using different knots

Supplementary Figure 2. A schematic diagram of the mTOR signaling pathway

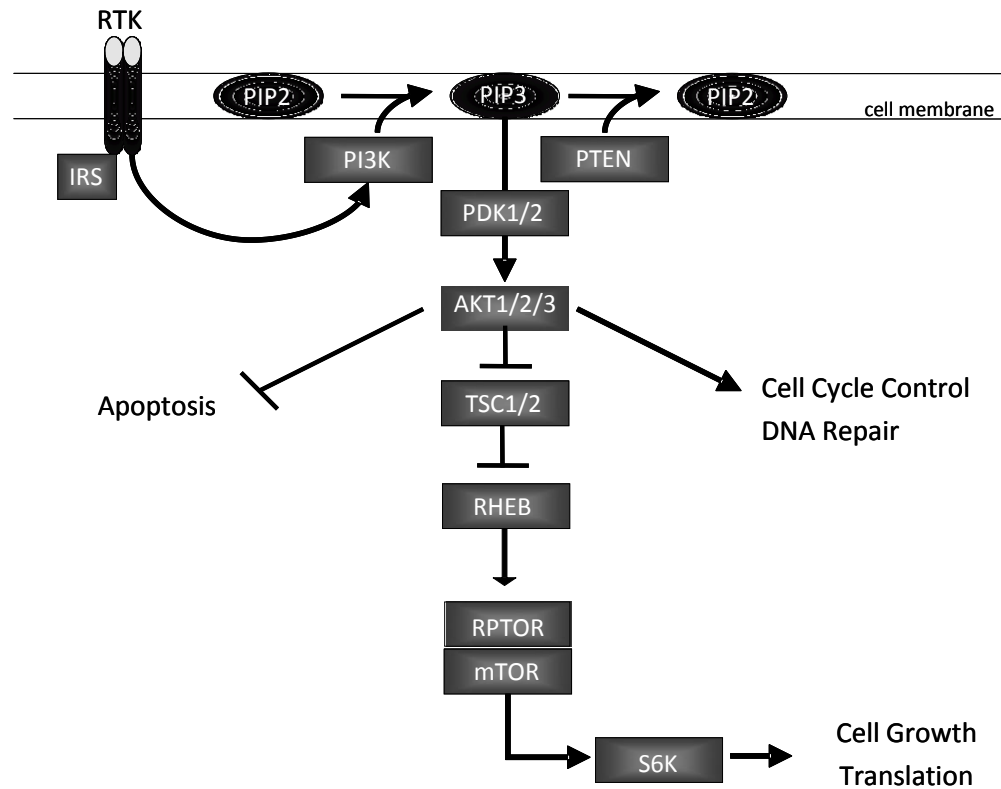

Supplementary Figure 2. mTOR signaling pathway
